# Supplementary material for: Characteristics of a Rollable Dielectric Barrier Discharge Plasma and Its Effects on Spinach-Seed Germination
Source: MDPI journal article supplement (doi:10.3390/ijms24054638), 2023-02-27
Supplement: s1 [file s1]

Supporting Information

# Characteristics of a rollable DBD plasma device and its effects on spinach seed germination

Jun Sup Lim<sup>1</sup>, Daeun Kim<sup>2</sup>, Sehoon Ki<sup>3</sup>, Sohail Mumtaz<sup>2</sup>, Abdul Munna Shaik<sup>2</sup>, Ihn Han<sup>1</sup>, Young June Hong<sup>1</sup>, Gyungsoon Park<sup>2</sup>, Eun Ha Choi<sup>1,2</sup>

<sup>1</sup>Plasma Bioscience Research Center (PBRC), Kwangwoon University, Seoul 01897, Republic of Korea

<sup>2</sup>Electrical and biological physics department, Kwangwoon University, Seoul 01897, Republic of Korea

<sup>3</sup>Institute of plasma technology, Korea institute of fusion energy, Gunsan 54004, Republic of Korea

\* Corresponding author, E-mail address: [ehchoi@kw.ac.kr](mailto:ehchoi@kw.ac.kr)

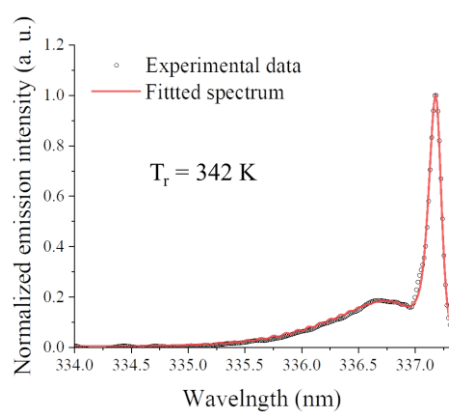

(a)

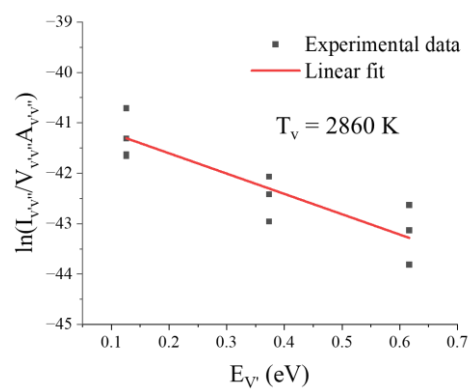

(b)

Figure S1. (a) Experimental and simulated spectrum for rotational temperature in nitrogen second positive system in 337 nm ( $C^3\Pi_u(v=0) \rightarrow B^3\Pi_g(v=0)$ ), (b) Boltzmann plot for vibrational temperature

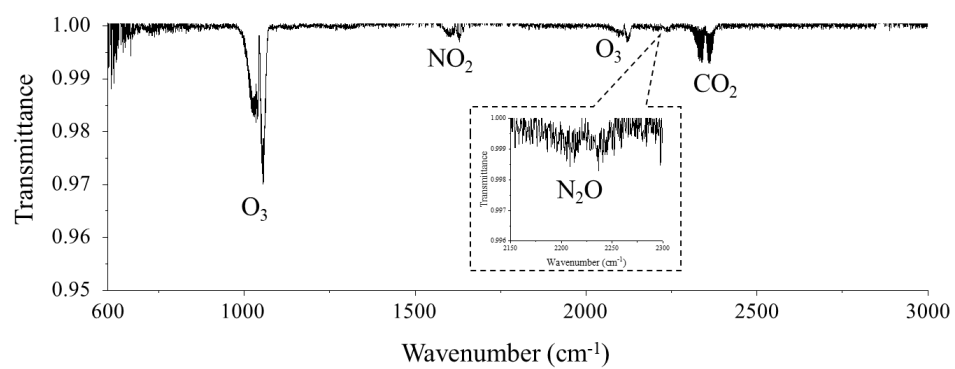

Figure S2. Transmittance result of RDBD by FTIR

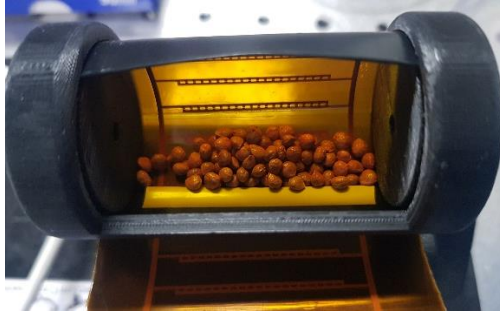

Figure S3. RDBD with mount for seed treatment
